# Supplementary material
Source: PubMed Central journal article supplement (PMC6876118)

|       | C1                 | W       | W     | C2               | C3              | R           | R        | R       | C4           | C5          | C6           |       |        |     |       |     |      |     |     |      |    |    |    |   |    |     |
|-------|--------------------|---------|-------|------------------|-----------------|-------------|----------|---------|--------------|-------------|--------------|-------|--------|-----|-------|-----|------|-----|-----|------|----|----|----|---|----|-----|
| F-SP: | ETCIYSNWSPWSACSST  | CDK     | ----- | GKRMQRMLKA-QL--  | DLS-VP          | CP          | -----    | DTQDFQ  | ---PCMG-PGCS | DED         |              |       |        |     |       |     |      |     |     |      |    |    |    |   |    |     |
| F-SP: | STCTMSEWITWSPCSIS  | CGM     | ----- | GMRSRERYVK--QFP  | EDGS-V          | CTLP        | ---      | TEETEK  | -----        | CTV-NE      | CSP          |       |        |     |       |     |      |     |     |      |    |    |    |   |    |     |
| F-SP: | SSCLMTEWGEWDECSAT  | CGM     | ----- | GMKKRHRMIKMN--   | P-ADGS-M        | CKAE        | ---      | TSQAEK  | -----        | CMM-PE      | CHT          |       |        |     |       |     |      |     |     |      |    |    |    |   |    |     |
| F-SP: | IPCLLSPWSEWSDCSVT  | CGK     | ----- | GMRTQRMLKSL---   | AELG--          | DCNED       | ---      | LEQVEK  | -----        | CML-PE      | CP           |       |        |     |       |     |      |     |     |      |    |    |    |   |    |     |
| F-SP: | IDCELEWESQWSECNKS  | CGK     | ----- | GHVIRTRMIQME--   | P-QFGG-AP       | CP          | -----    | ETVQRKK | ---          | CRIRK       | CLRNP        |       |        |     |       |     |      |     |     |      |    |    |    |   |    |     |
| F-SP: | PGCRMRPWTAWSECTKL  | CGG     | ----- | GIQERYMTVKKRFKSS | QFTS--          | CK          | -----    | DKKEIRA | ---          | CNVHP       | C            |       |        |     |       |     |      |     |     |      |    |    |    |   |    |     |
| D3:   | DCIVSEFSAWSECSKT   | CGS     | ----- | GLQHRTRHVVA--    | PP-QFGGSG       | CPN         | ---      | LTEF-QV | -----        | CQSS-PC     | EAAE         |       |        |     |       |     |      |     |     |      |    |    |    |   |    |     |
| D5:   | ECQVSEWSEWSPCSKT   | CHDMVSP | --    | AGTRVTRTIR--     | QFP--           | IGSEKE      | CP       | ---     | FEE-KE       | -----       | PCLSQGDGVVPC | CAT   |        |     |       |     |      |     |     |      |    |    |    |   |    |     |
| D7:   | ECEVSPWSAWGPCITYEN | CND     | QQ    | GKK--            | GFKLKRRTITNE    | PTGGSGVTGN  | CP       | ---     | HLL          | EAI         | -----        | PC    | E-EPAC |     |       |     |      |     |     |      |    |    |    |   |    |     |
| D9:   | DCVLSTWSTWSSCSHT   | CSG     | KTTE  | ---              | GKQIRARS-ILAYAG | EEGGIR      | CPNSSAL  | QE      | ---          | VRS         | -----        | CN    | -EHP   | CTV |       |     |      |     |     |      |    |    |    |   |    |     |
| D11:  | DCIVTPYSDWTS       | CPSS    | CKEG  | DSS--            | IRKQSRHR--      | VIIQLPAN-GG | RD       | CTDP    | ---          | LYEE-KA     | -----        | CEAPQ | ACQS   |     |       |     |      |     |     |      |    |    |    |   |    |     |
| D13:  | DCQLTSWSKFSS       | CNGD    | CG    | -----            | AVRTRKRTLVG-KS  | ---         | KKKEK    | CKNS    | ---          | HLYPLI-ETQY | ---          | CP    | CDK    |     |       |     |      |     |     |      |    |    |    |   |    |     |
| D15:  | DCKLSEWSNWSRCSKS   | CGS     | ----- | GVKVRKWLREK      | -P-YNGGR-PCPKL  | DHVNQA-QVY  | EVVP     | CHSD    | ---          | CNQ         |              |       |        |     |       |     |      |     |     |      |    |    |    |   |    |     |
| D17:  | DCVISEWGPWTQCVLP   | CNQS    | ----- | SFRQRSADP-IRQ    | -P-ADEGRS       | CPNA        | ---      | V-E--KE | -----        | PCNLN       | KN           | CYH   |        |     |       |     |      |     |     |      |    |    |    |   |    |     |
| D19:  | NCQLSDWSPWSECSQT   | CGLT    | ----- | GKMIRRT-VT-Q     | PFQDGR-PCPS     | ---         | LMD      | QSK     | -----        | PCPV        | -KPC         |       |        |     |       |     |      |     |     |      |    |    |    |   |    |     |
| D21:  | DCYLKDWSSWSL       | CQLT    | CVNG  | ED               | LGFGGIQVRSR     | -PVIIQ--    | ELEN     | QHL     | CP           | EQ          | ---          | MLE   | -TKS   | --- | CYD   | GQ  | ---  | CYE |     |      |    |    |    |   |    |     |
| C6:   | CFCDHYAWTQWTS      | CSKT    | CNS   | -----            | GTQSRHQIVV---   | DKYYQENFC   | EQICS    | KQ      | ETRE         | -----       | CNW          | QR    | ---    | CP  |       |     |      |     |     |      |    |    |    |   |    |     |
| C6:   | INCLLGDGFGPWS      | CDP     | CIE   | ---              | KQSKVRSVLR      | ---         | PSQ      | FGGQ    | ---          | PC          | TAPL         | VAFQ  | -----  | PC  | IPSKL | --- | CKIE |     |     |      |    |    |    |   |    |     |
| C6:   | DGQWG              | CWSS    | WST   | C                | DAT             | -----       | YKRSRTRE | C       | NN           | PAP         | QR           | ---   | GGKR   | --- | CE    | EKR | Q    | EE  | --- | CTFS | IM | EN | NG | Q | PC | IND |

Strand A
Strand B
Strand C

**a**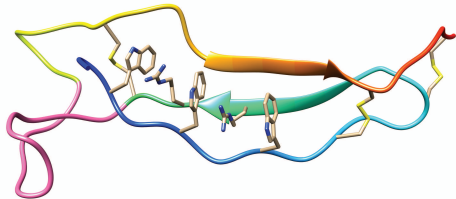**b**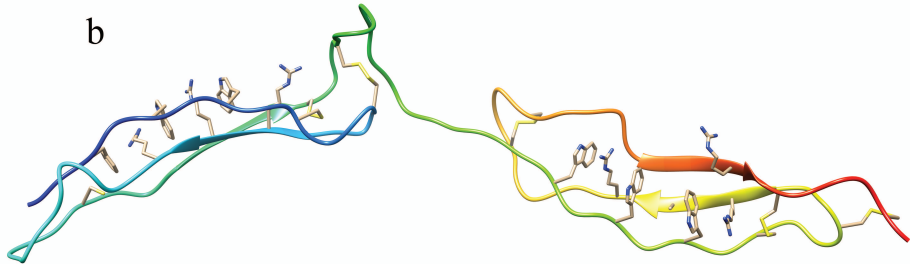

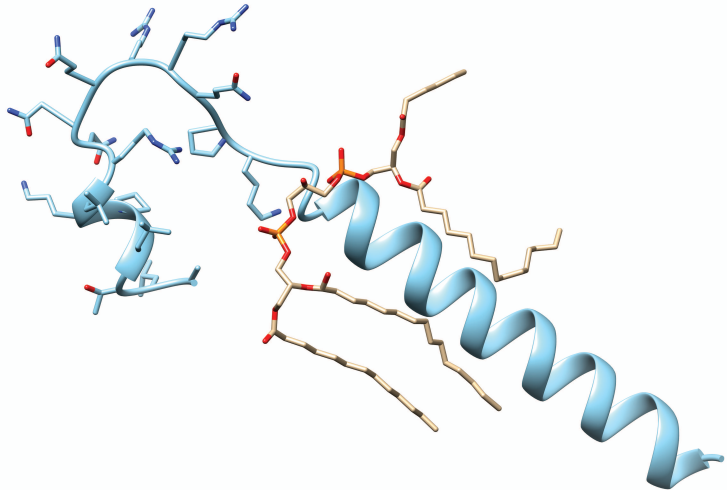

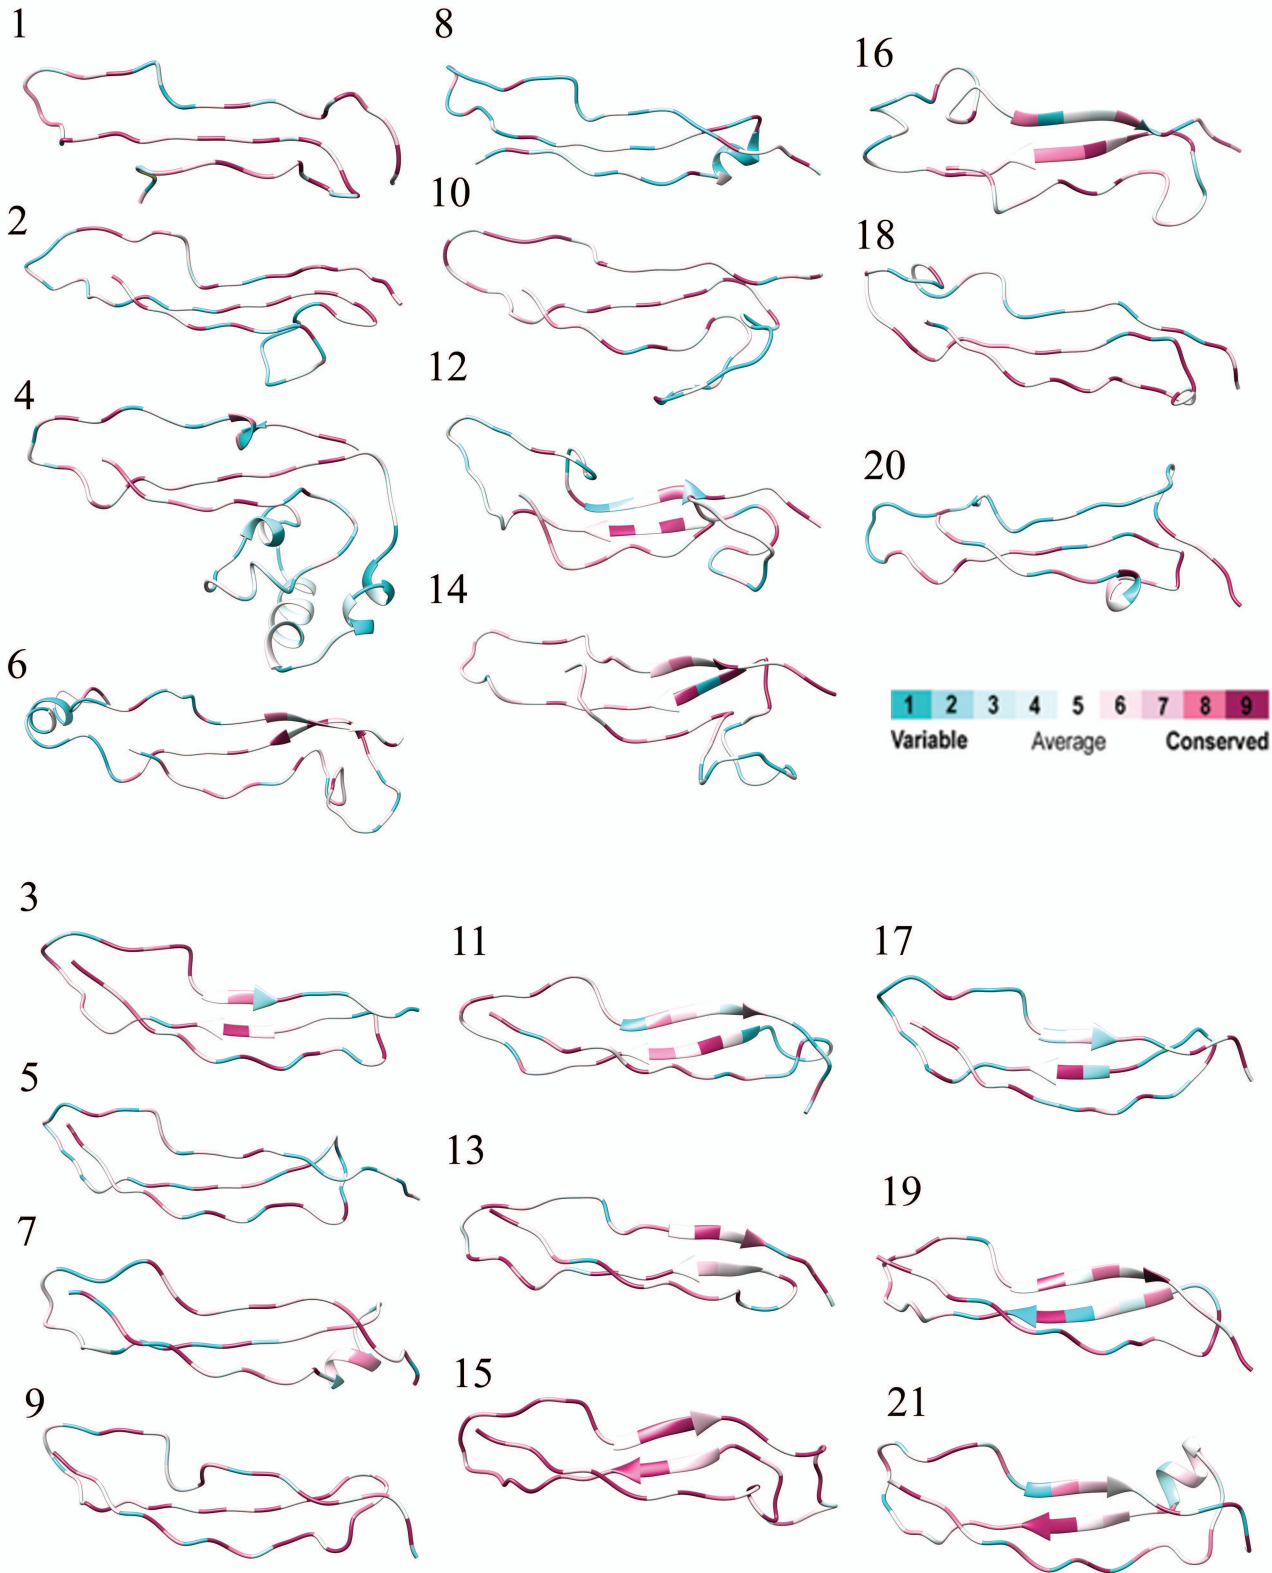

Supplement: NIHMS1005122-supplement-Supp_FigS1-4.pdf [file NIHMS1005122-supplement-Supp_FigS1-4.pdf]
